# Supplementary material
Source: publisher site journal article supplement (https://www.dovepress.com/article/488213)
Supplement: Supplementary file 1 [file get_supplementary_file.php]

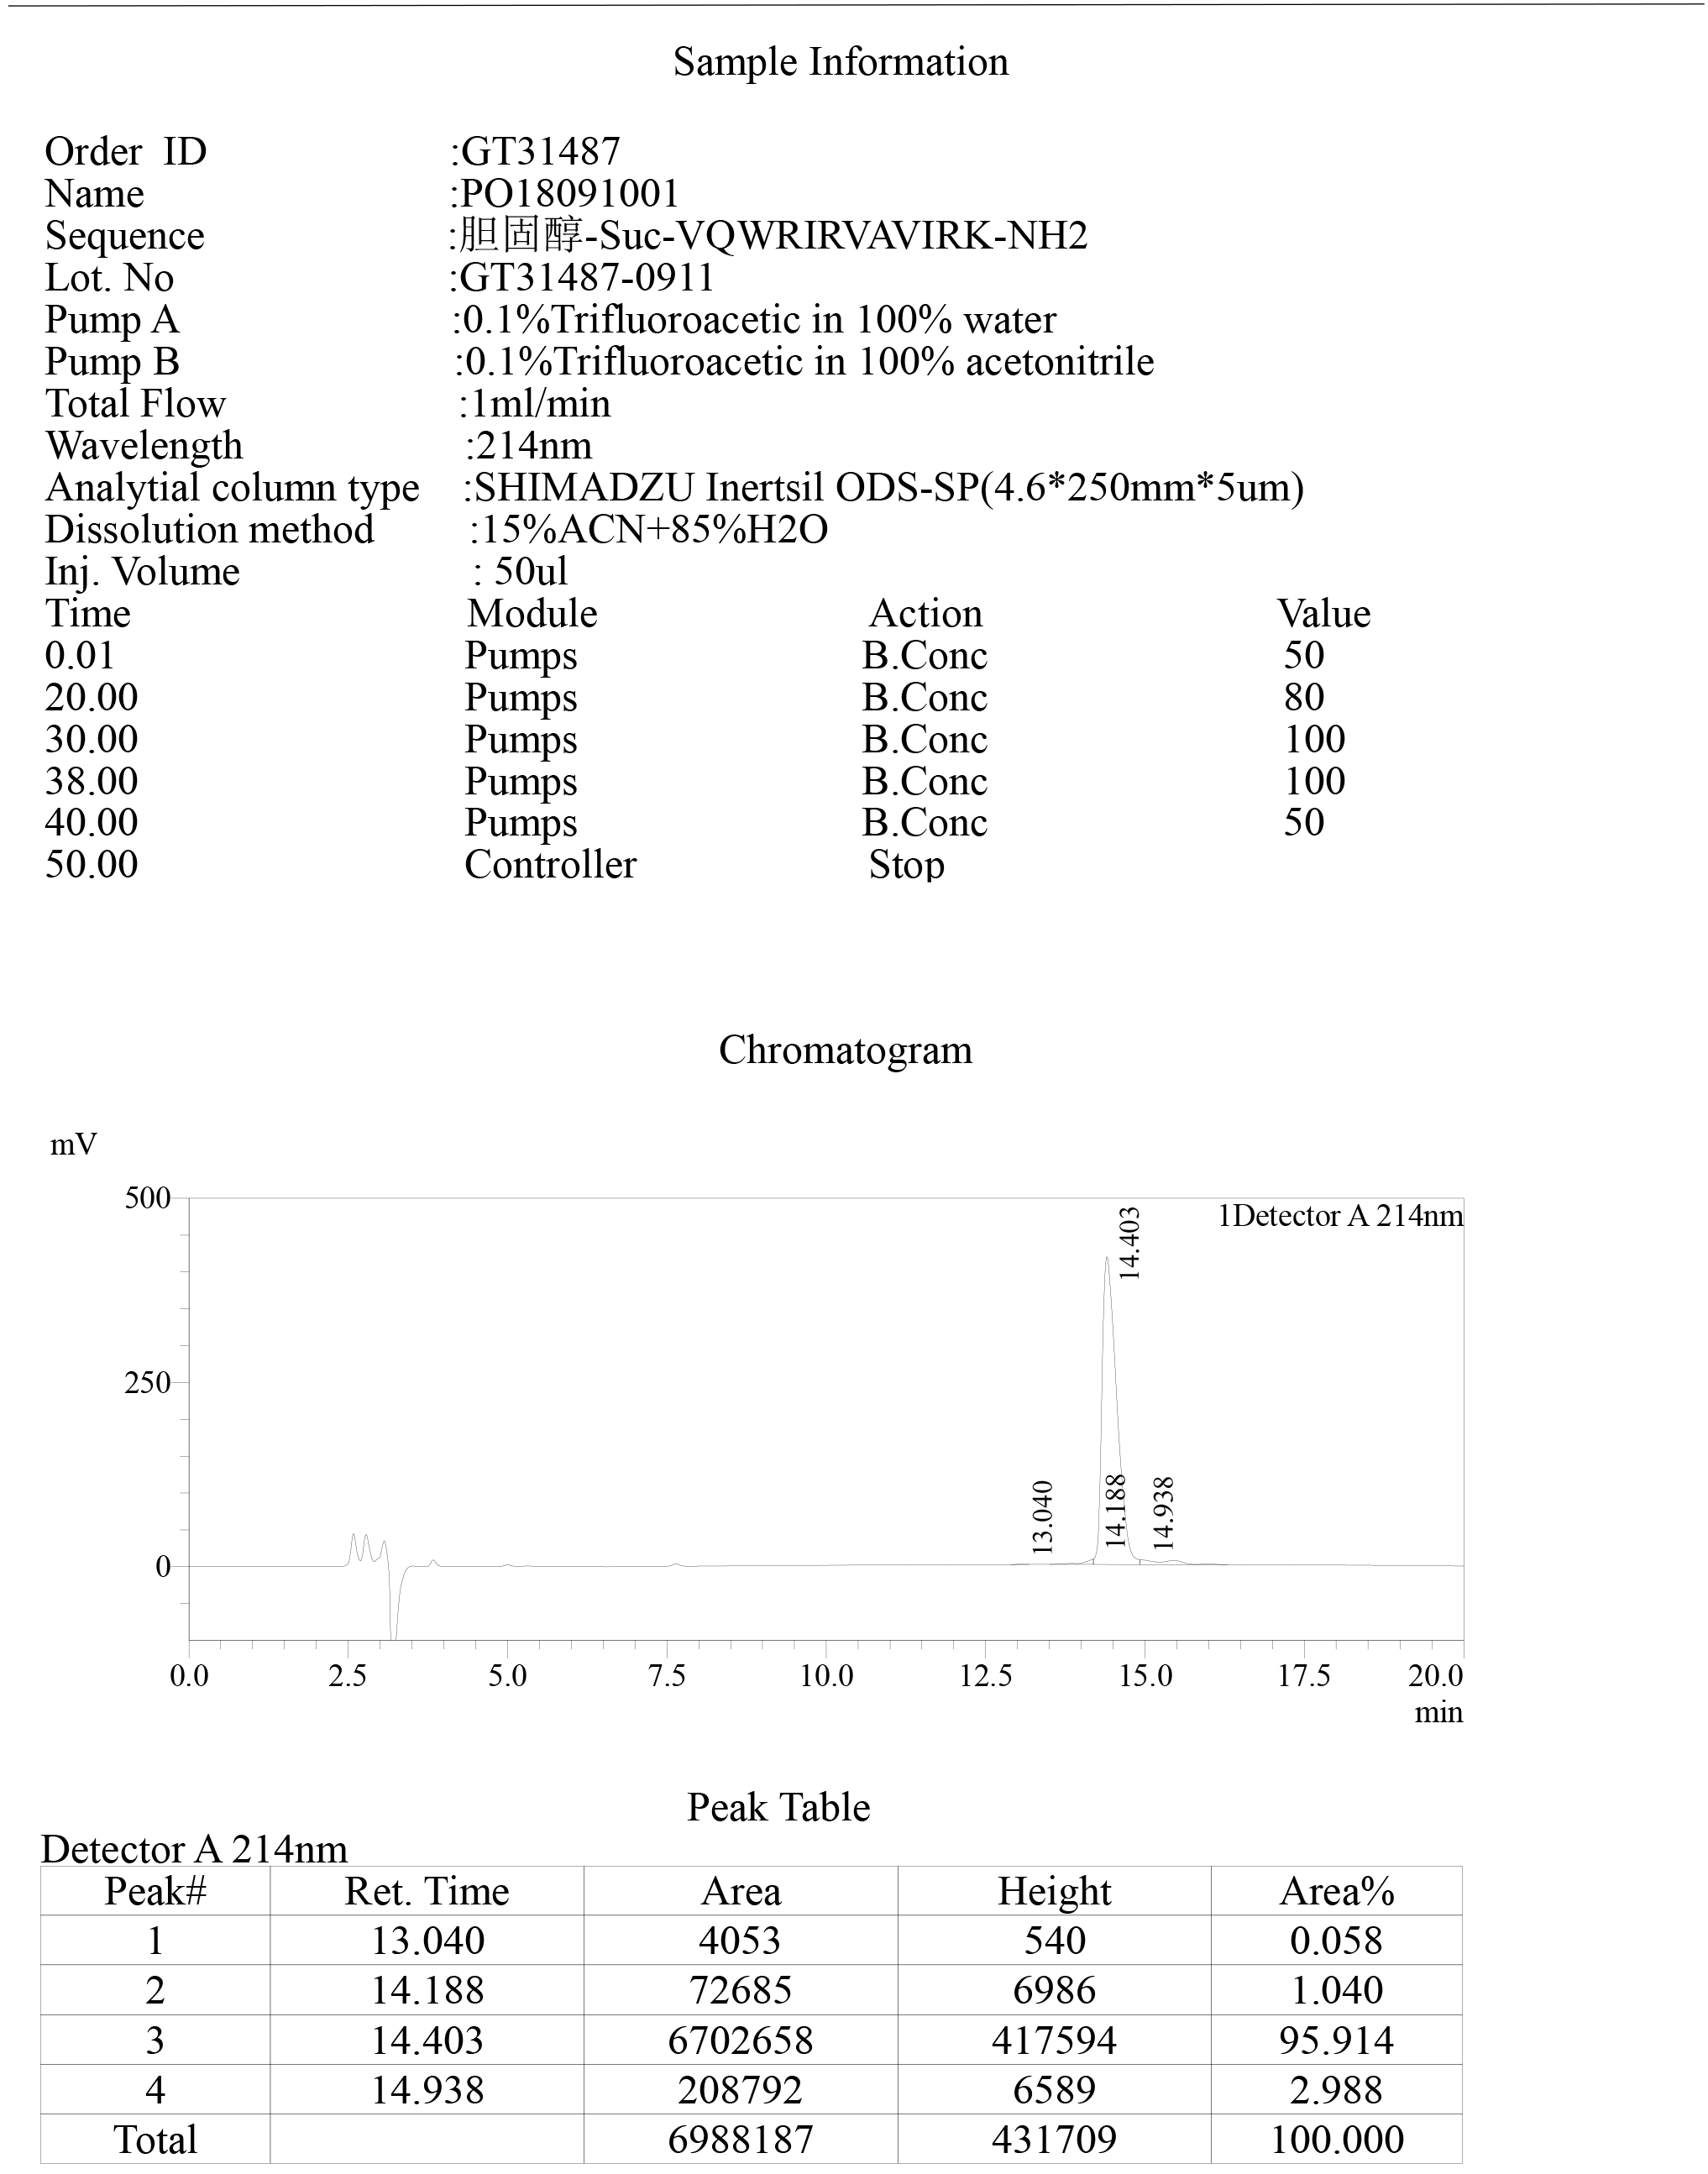


**Supplementary Figure 1.** HPLC results of DP7-C


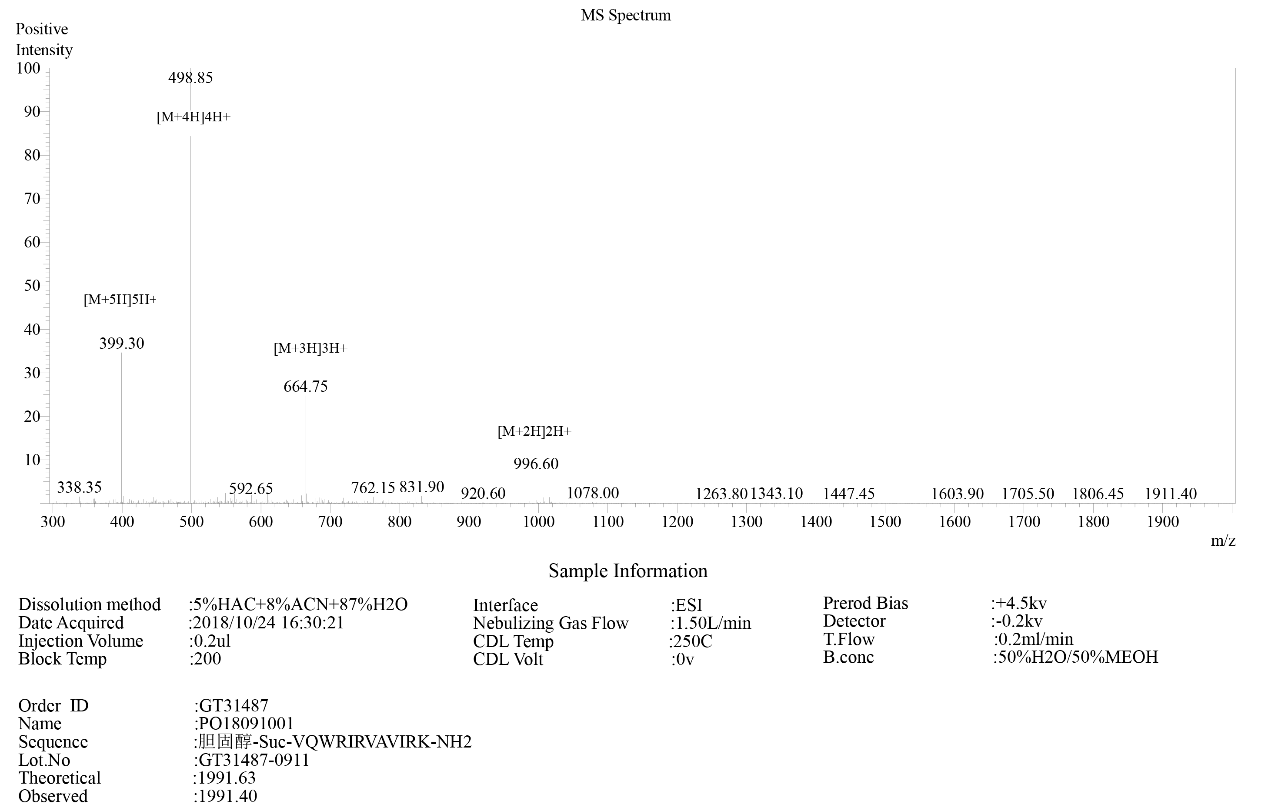


**Supplementary Figure 2.** MS results of DP7-C

**
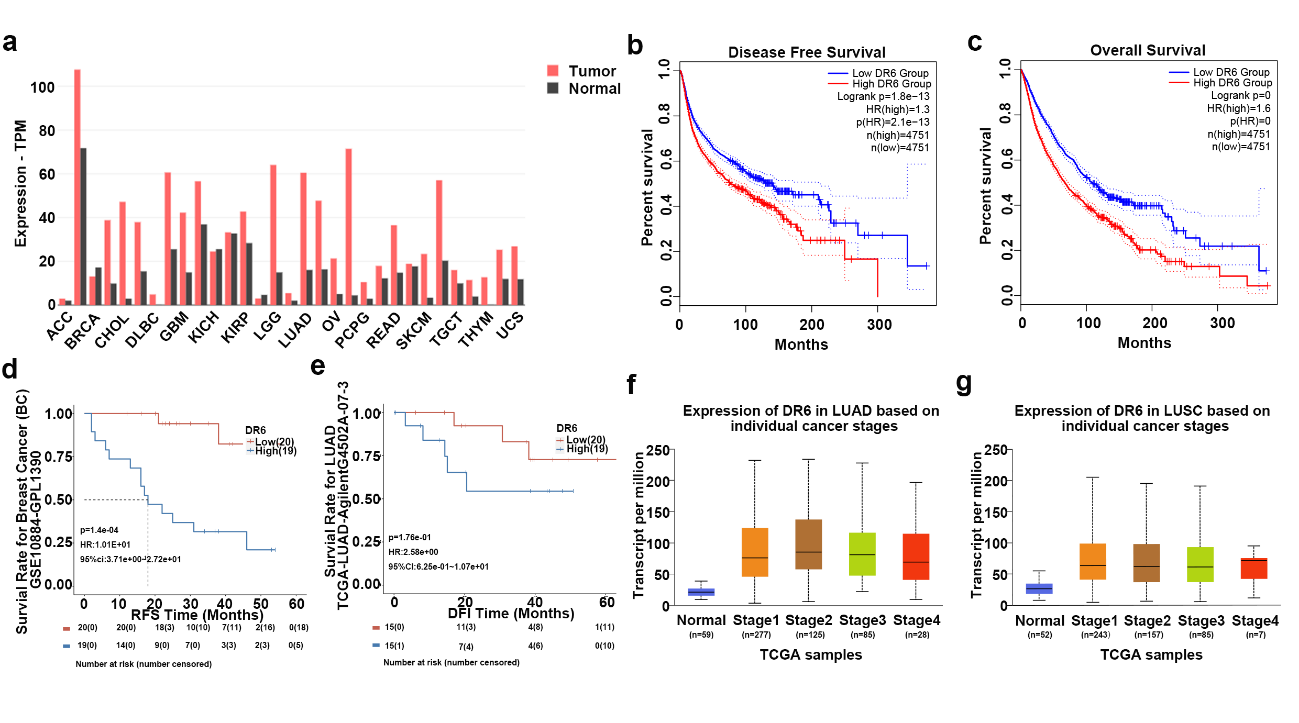
**

**Supplementary Figure 3.** DR6 expression profile and the survival correlation analysis on DR6 expression levels. (a) DR6 expression profile in all tumor samples and paired normal tissues. Survival correlation analysis on DR6 expression levels in all cancer specimens (b-c), breast cancer specimens (d) and LUAD cancer specimens (e). DR6 expression profile in LUAD cancer specimens (f) and LUSC cancer specimens (g) based on individual cancer stages.


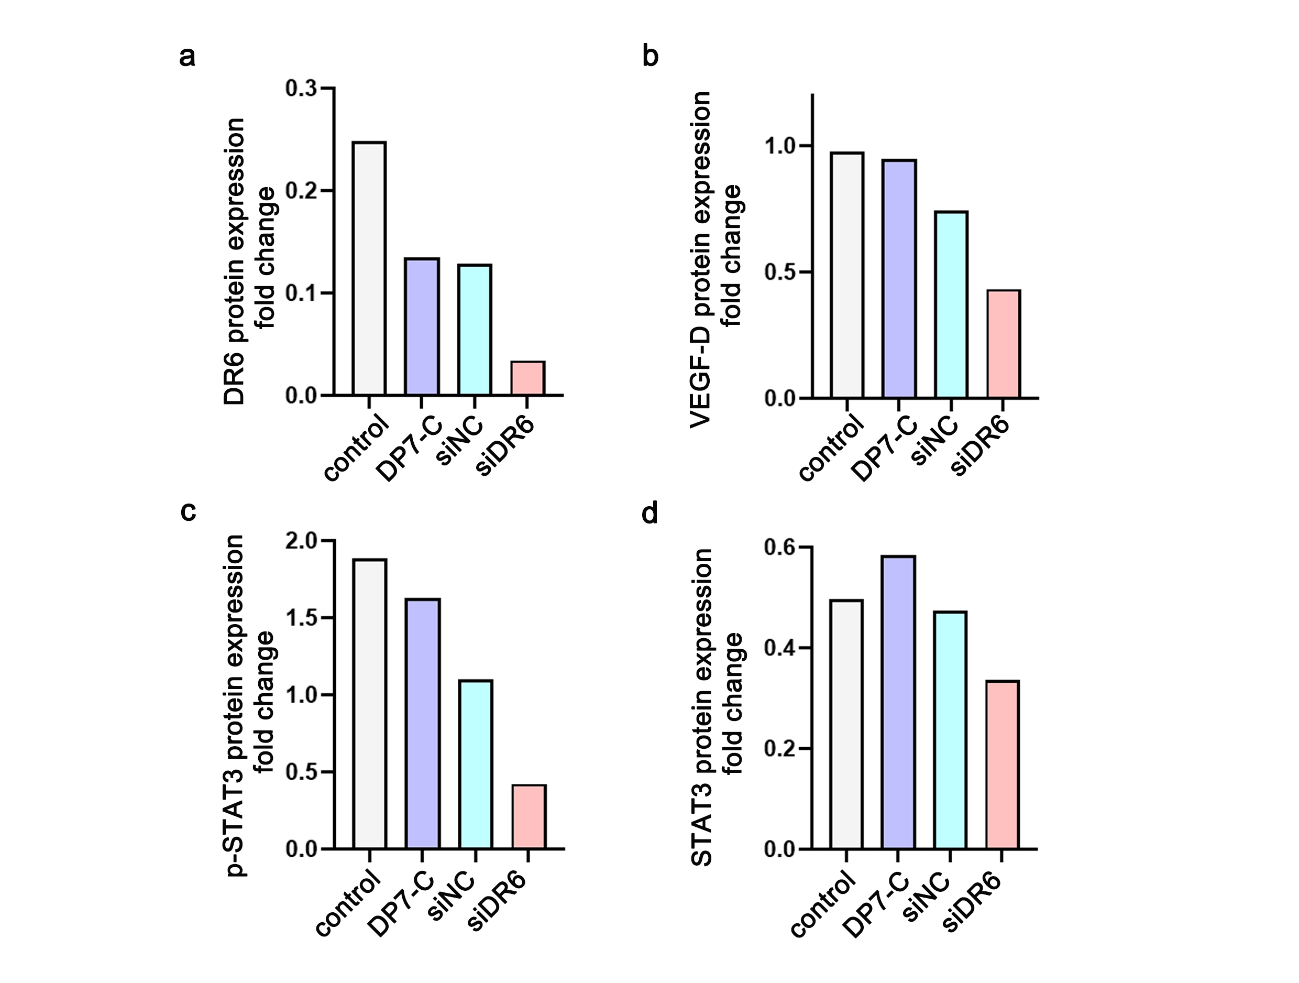


**Supplementary Figure 4.** Semi-quantitative analysis of the western blot data for (a) DR6 in Figure 2e, (b) VEGF-D in Figure 2e, (c) p-STAT3 in Figure 2e, (d) STAT3 in Figure 2e.


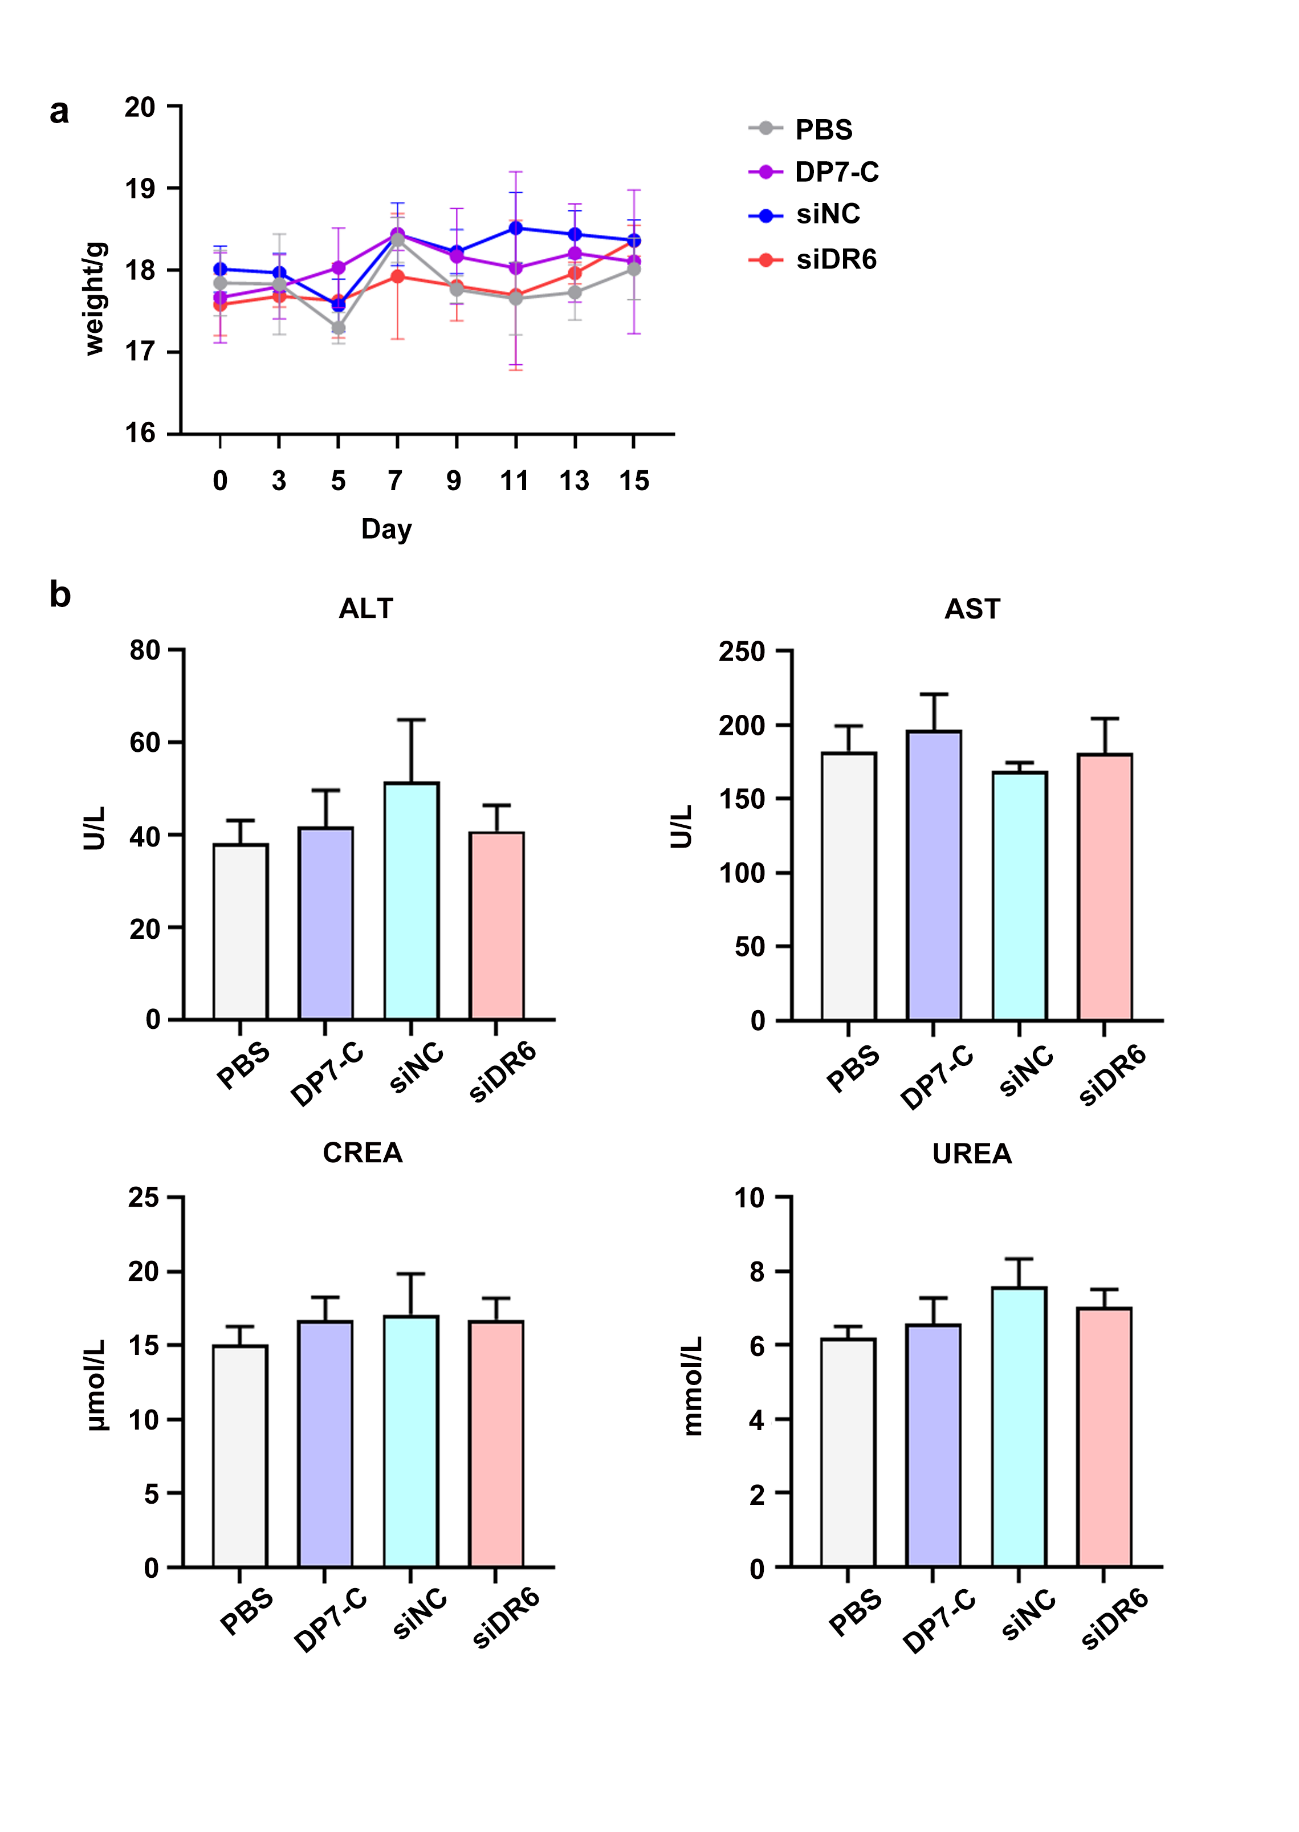


**Supplementary Figure 5.** (a) Changes in body weight of mice with B16F10 artificial lung metastasis model. (b) Blood biochemical analysis, including evaluation of liver function (aspartate transaminase and alanine aminotransferase), and kidney function (creatinine and urea) in mice bearing tumors following drug treatment.
